# Supplementary material for: Enhancing anti-thrombogenicity of biodegradable polyurethanes through drug molecule incorporation
Source: Royal Society of Chemistry journal article supplement (doi:10.1039/c8tb01582a), 2018-01-01
Supplement: c8tb01582a1.pdf [file c8tb01582a1.pdf]

*Electronic Supplementary Material (ESI)*

**Enhancing anti-thrombogenicity of biodegradable polyurethanes through  
drug molecule incorporation†**

Cancan Xu,<sup>a,b</sup> Aneetta E. Kuriakose,<sup>a,b</sup> Danh Truong,<sup>a,b</sup> Primana Punnaikashem,<sup>a,b</sup> Kytai T.

Nguyen,<sup>a,b</sup> and Yi Hong<sup>a,b,\*</sup>

<sup>a</sup>Department of Bioengineering, University of Texas at Arlington, Arlington, TX 76019, USA

<sup>b</sup>Joint Biomedical Engineering Program, University of Texas Southwestern Medical Center,  
Dallas, TX 75390, USA

**\*Corresponding author:** Yi Hong, [yihong@uta.edu](mailto:yihong@uta.edu), Tel: +1-817-272-0562; Fax: +1-817-272-2251.

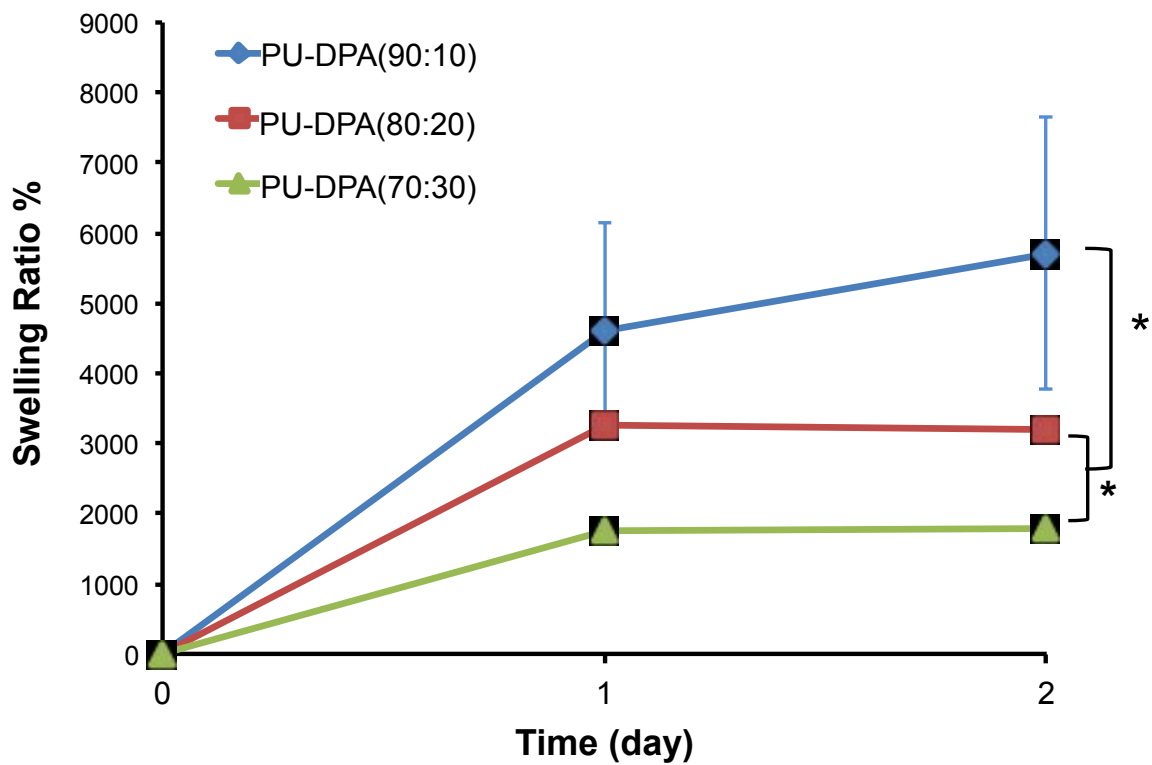

**Supplementary Figure 1.** Swelling ratios of PU-DPA polymers in HFIP to show their different crosslinking degrees, \* indicates significantly different group ( $p < 0.05$ ).
